# Supplementary material
Source: PubMed Central journal article supplement (PMC2785850)
Supplement: NIHMS144563-supplement-1_si_001.pdf [file NIHMS144563-supplement-1_si_001.pdf]

Supplemental Table 1. Yeast strains used in study

| Strain   | Genotype                                                                                                                                           | Source/Comments                                  |
|----------|----------------------------------------------------------------------------------------------------------------------------------------------------|--------------------------------------------------|
| W303-1   | <i>MATa ade2 ura3 leu2 trp1 his3 can1</i>                                                                                                          | <b>a</b>                                         |
| EMY60    | <i>MATa ade2 ade3 ura3 leu2 trp1 his3 Δlys2:HIS3 can1</i>                                                                                          | His <sup>-</sup> due to <i>ade3</i> <sup>b</sup> |
| EMY56-5D | <i>MATα ade2 ura3 leu2 trp1 his3 Δlys2:HIS3 Δtrx1:LYS2 Δtrx2:LEU2 can1</i>                                                                         | Met <sup>-</sup> <sup>c</sup>                    |
| MY203    | <i>MATa/MATα ade2/ade2 ura3/ura3 leu2/LEU2:GAL1-LacZ trp1/trp1 his3/his3 LYS2/lys2 TRR1/Δtrr1:HIS3 SWI6/Δswi6:TRP1 MET/met</i>                     | <b>d</b>                                         |
| MY218    | <i>MATα ade2 ura3 leu2 trp1 his3 lys2 Δtrr1:HIS3</i>                                                                                               | MY203 spore                                      |
| MY243    | <i>MATa ade2 ura3 leu2 trp1 his3 Δtrr2:URA3</i>                                                                                                    | Gene transplacement                              |
| MY276    | <i>MATa ade2 ura3 leu2 trp1 his3 lys2 Δswi6:TRP1</i>                                                                                               | <b>d</b>                                         |
| MY284    | <i>MATa/MATα ade2/ade2 ura3/ura3 leu2/leu2 trp1/trp1 his3/his3 LYS2/lys2 TRR1/Δtrr1:HIS3 TRR2/Δtrr2:URA3</i>                                       | MY218 x MY243                                    |
| MY287    | <i>MATα ade2 ura3 leu2 trp1 his3 lys2 Δtrr1:HIS3 Δtrr2:URA3</i>                                                                                    | MY284 spore, Met <sup>e</sup>                    |
| MY301    | <i>MATa ade2 ura3 leu2 trp1 his3 Δtrr1:HIS3 bar1</i>                                                                                               | Met <sup>ef</sup>                                |
| MY320    | <i>MATa ade2 ura3 leu2 trp1 his3 can1 pRS305- p53 RE-Z:LEU2</i>                                                                                    | From W303-1                                      |
| MY321    | <i>MATa ade2 ura3 leu2 trp1 his3 Δtrr1:HIS3 bar1 pRS305- p53 RE-Z:LEU2</i>                                                                         | From MY301                                       |
| MY324    | <i>MATa/MATα ade2/ade2 ura3/ura3 leu2/leu2 trp1/trp1 his3/his3 lys2/Δlys2:HIS3 SWI6/Δswi6:TRP1 TRR1/Δtrr1:HIS3 TRX1/Δtrx1:LYS2 TRX2/Δtrx2:LEU2</i> | MY276 x EMY56-5D                                 |
| MY325    | <i>MATa ade2 ura3 leu2 trp1 his3 lys2 Δtrx1:LYS2 Δtrx2:LEU2</i>                                                                                    | MY324 spore, Met <sup>-</sup>                    |
| MY327    | <i>MATa/MATα ade2/ade2 ura3/ura3 leu2/leu2 trp1/trp1 his3/his3 lys2/lys2 TRR1/Δtrr1:HIS3 TRR2/Δtrr2:URA3 TRX1/Δtrx1:LYS2 TRX2/Δtrx2:LEU2</i>       | MY287 x MY325                                    |
| MY332    | <i>MATα ade2 ura3 leu2 trp1 his3 lys2 Δtrr1:HIS3 Δtrx1:LYS2 Δtrx2:LEU2</i>                                                                         | MY327 spore, Met <sup>-</sup>                    |
| MY339    | <i>MATa ade2 ura3 leu2 trp1 his3 lys2</i>                                                                                                          | MY324 spore                                      |
| MY340    | <i>MATa/MATα ade2/ade2 ura3/ura3 leu2/leu2 trp1/trp1 his3/his3 lys2/lys2 TRR1/Δtrr1:HIS3 TRX1/Δtrx1:LYS2 TRX2/Δtrx2:LEU2</i>                       | MY332 x MY339                                    |
| MY364    | <i>MATα ade2 ura3 leu2 trp1 his3 lys2</i>                                                                                                          | From MY340 tetrad                                |
| MY366    | <i>MATα ade2 ura3 leu2 trp1 his3 lys2 Δtrr1:HIS3</i>                                                                                               | From MY340 tetrad, Met <sup>e</sup>              |
| MY367    | <i>MATa ade2 ura3 leu2 trp1 his3 lys2 Δtrx1:LYS2 Δtrx2:LEU2</i>                                                                                    | From MY340 tetrad, Met <sup>-</sup>              |
| MY368    | <i>MATa ade2 ura3 leu2 trp1 his3 lys2 Δtrx2:LEU2</i>                                                                                               | From MY340 tetrad                                |
| MY369    | <i>MATa ade2 ura3 leu2 trp1 his3 lys2 Δtrr1:HIS3 Δtrx1:LYS2</i>                                                                                    | From MY340 tetrad, Met <sup>e</sup>              |
| MY370    | <i>MATα ade2 ura3 leu2 trp1 his3 lys2 Δtrr1:HIS3 Δtrx1:LYS2 Δtrx2:LEU2</i>                                                                         | From MY340 tetrad, Met <sup>-</sup>              |
| MY371    | <i>MATα ade2 ura3 leu2 trp1 his3 lys2 Δtrx1:LYS2</i>                                                                                               | From MY340 tetrad                                |
| MY372    | <i>MATa ade2 ura3 leu2 trp1 his3 lys2 Δtrr1:HIS3 Δtrx2:LEU2</i>                                                                                    | From MY340 tetrad, Met <sup>-</sup>              |

- <sup>a</sup> Wallis, J. W., Chrebet, G., Brodsky, G., Rolfe, M., and Rothstein, R. (1989) *Cell* 58, 409-419.
- <sup>b</sup> Muller, E. G. D. (1994) *J. Biol. Chem.* 269, 24466-24471.
- <sup>c</sup> Muller, E. G. D. (1996) *Molec. Biol. Cell* 7, 1805-1813.
- <sup>d</sup> Machado, A. K., Morgan, B. A., and Merrill, G. M. (1997) *J. Biol. Chem.* 272, 17045-17054.
- <sup>e</sup> Grows slowly in the absence of methionine.
- <sup>f</sup> Pearson, G. D., and Merrill, G. F. (1998) *J Biol Chem* 273, 5431-5434.

Supplemental Table 2: Oligonucleotide primers used for p53 PCR mutagenesis

| p53 allele   | Vector (end) primer <sup>a</sup> | Mutagenic primer                                  |
|--------------|----------------------------------|---------------------------------------------------|
| C124S        | forward                          | 5'-GGAGTACGTGCTAGTCACAGAC-3'                      |
| C124S        | reverse                          | 5'-TCTGTGACTAGCACGTACTCCC-3'                      |
| C135S        | forward                          | 5'-GGCCAGTTGGCTAAACATCTTG-3'                      |
| C135S        | reverse                          | 5'-AACATGTTTAGCCAAGTGGCC-3'                       |
| C141S        | forward                          | 5'-CTGCACAGGGCTGGTCTTGGCC-3'                      |
| C141S        | reverse                          | 5'-GCCAAGACCAGCCCTGTGCAGC-3'                      |
| C176S        | forward                          | 5'-ATGGTGGGGGCTGCGCCTCAC-3'                       |
| C176S        | reverse                          | 5'-GTGAGGCGCAGCCCCACCAT-3'                        |
| C182S        | forward                          | 5'-GCTATCTGAGCTGCGCTCATGG-3'                      |
| C182S        | reverse                          | 5'-CATGAGCGCAGCTCAGATAGC-3'                       |
| C229S        | forward                          | 5'-GATGGTGGTACTGTCAGAGCC-3'                       |
| C229S        | reverse                          | 5'-GGCTCTGACAGTACCACCATC-3'                       |
| C238S        | forward                          | 5'-GGAAGTGTACTCATGTAGTT-3'                        |
| C238S        | reverse                          | 5'-AACTACATGAGTAACAGTTCC-3'                       |
| C242S        | forward                          | 5'-GCCGCCATGCTGGAAGTGT-3'                         |
| C242S        | reverse                          | 5'-AACAGTCCAGCATGGGCGGC-3'                        |
| C275S        | forward                          | 5'-CCCAGGACAGGCACTAACACGCAC-3'                    |
| C275S        | reverse                          | 5'-GAGGTGCGTGTTAGTGCTGTCCT-3'                     |
| C277S        | forward                          | 5'-CGTGTGTTGTGCCAGTCCTGGGAGA-3'                   |
| C277S        | reverse                          | 5'-GTCTCTCCAGGACTGGCACAAAC-3'                     |
| C275S/ C277S | forward                          | 5'-TCTCCAGGACTGGCACTAACACGCACC-3'                 |
| C275S/ C277S | reverse                          | 5'-GTGCGTGTTAGTGCCAGTCCTGGGAGA-3'                 |
| C124A        | forward                          | 5'-GGAGTACGTGGCAGTCACAGACTTG-3'                   |
| C124A        | reverse                          | 5'-GTCTGTGACTGCCACGTACTCCCT-3'                    |
| C135A/C141A  | forward                          | 5'-CTGCACAGGGGCGGTCTTGGCCAGTTGGGCAAACATCTTGTTG-3' |
| C135A/C141A  | reverse                          | 5'-AAGATGTTTGCCCAACTGGCCAAGACCGCCCTGTGCAGCTG-3'   |
| C275A        | forward                          | 5'-CCCAGGACAGGCAACACGCACCTC-3'                    |
| C275A        | reverse                          | 5'-GAGGTGCGTGTTGCTGCTGTCCTGGG-3'                  |

<sup>a</sup> Forward primer, 5'-GTCCTCGAGTTCACCATGGAGGAGCCGCAGTCAGAT-3'; Reverse primer, 5'-TTAGGATCCTCAGTCTGAGTCAGGCCCTTC-3'
